# Supplementary figures and images for: The Analysis of Transcriptomes and Microorganisms Reveals Differences between the Intestinal Segments of Guinea Pigs
Source: MDPI journal article supplement (doi:10.3390/ani12212925), 2022-10-25

**A****PSI**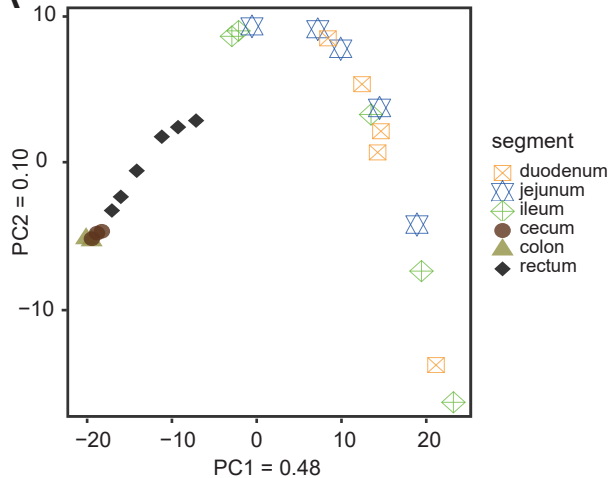**B****observed features**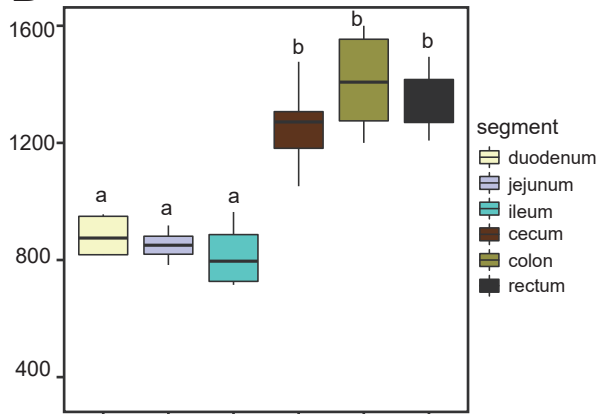

Supplement: s1 [file s1]
